# Supplementary material
Source: PubMed Central journal article supplement (PMC2940979)
Supplement: NIHMS220671-supplement-1.pdf [file NIHMS220671-supplement-1.pdf]

Supplementary Figure 1, Ibrahim et al

A

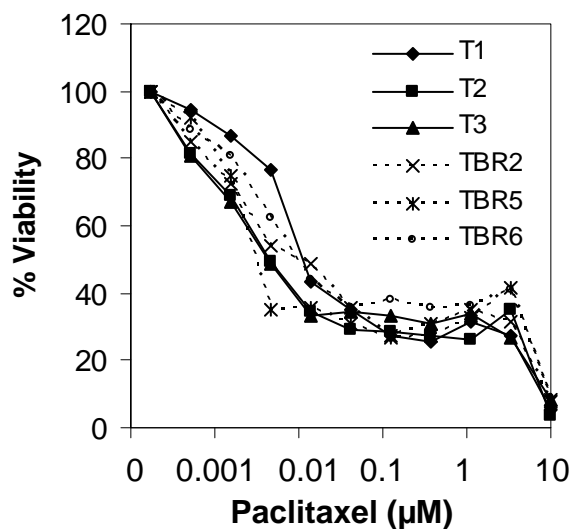

B

| Cell lines           | IC <sub>50</sub> |                 |
|----------------------|------------------|-----------------|
|                      | Cisplatin (µM)   | Paclitaxel (nM) |
| <b><u>Murine</u></b> |                  |                 |
| T1                   | 4.46 ± 0.43      | 11.94 ± 1.03    |
| T2                   | 3.58 ± 0.51      | 4.82 ± 1.35     |
| T3                   | 5.25 ± 0.68      | 4.93 ± 1.77     |
| TBR2                 | 0.18 ± 0.15      | 14.25 ± 4.44    |
| TBR5                 | 0.17 ± 0.05      | 3.84 ± 0.34     |
| TBR6                 | 0.26 ± 0.11      | 10.73 ± 1.82    |
| <b><u>Human</u></b>  |                  |                 |
| UWB1.289 Vector      | 0.63 ± 0.14      | N.D.            |
| UWB1.289 Brca1       | 7.63 ± 1.44      | N.D.            |

N.D. : Not determined

C

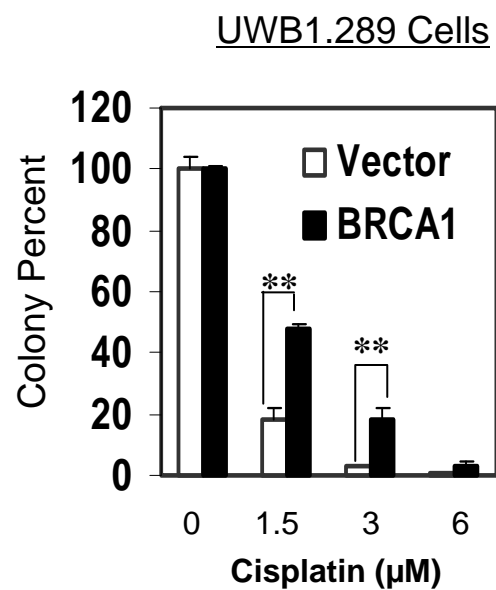

Supplementary Figure 2, Ibrahim et al

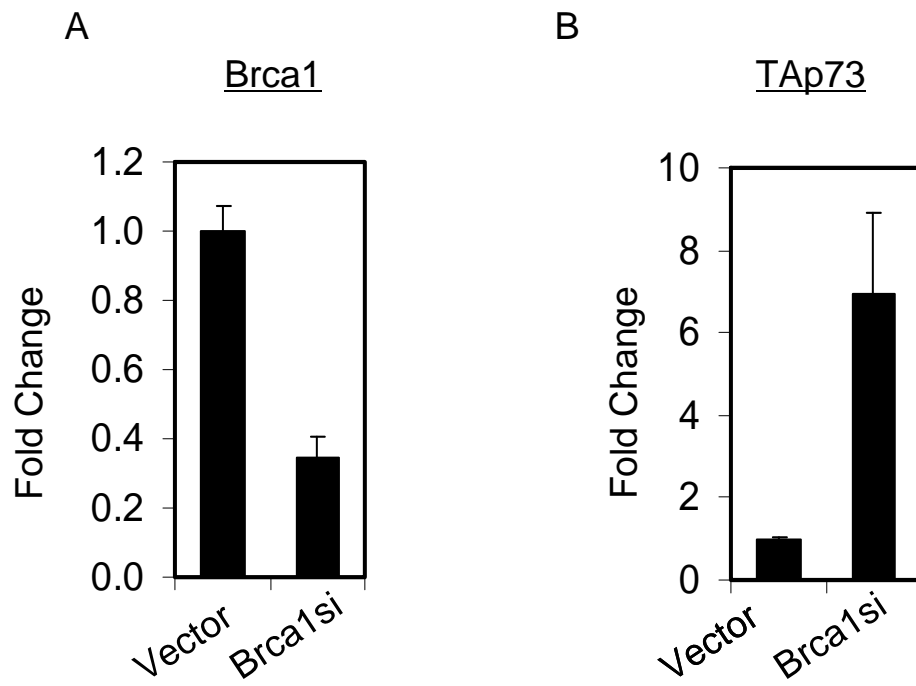

Supplementary Figure 3, Ibrahim et al

A

| Cell lines      | IC <sub>50</sub> Cisplatin (μM) |             |
|-----------------|---------------------------------|-------------|
|                 | Vector                          | TAp73si     |
| <b>Mouse</b>    |                                 |             |
| T1              | 1.73 ± 0.35                     | 1.72 ± 0.28 |
| T2              | 1.66 ± 0.47                     | 1.54 ± 0.52 |
| T3              | 1.82 ± 0.61                     | 1.66 ± 0.42 |
| TBR2            | 1.03 ± 0.50                     | 2.35 ± 0.43 |
| TBR5            | 0.25 ± 0.02                     | 0.59 ± 0.18 |
| TBR6            | 0.40 ± 0.12                     | 1.69 ± 0.58 |
| <b>Human</b>    |                                 |             |
| UWB1.289 Vector | 0.49 ± 0.08                     | 3.28 ± 0.39 |
| UWB1.289 Brca1  | 6.43 ± 0.58                     | 4.60 ± 0.96 |

B

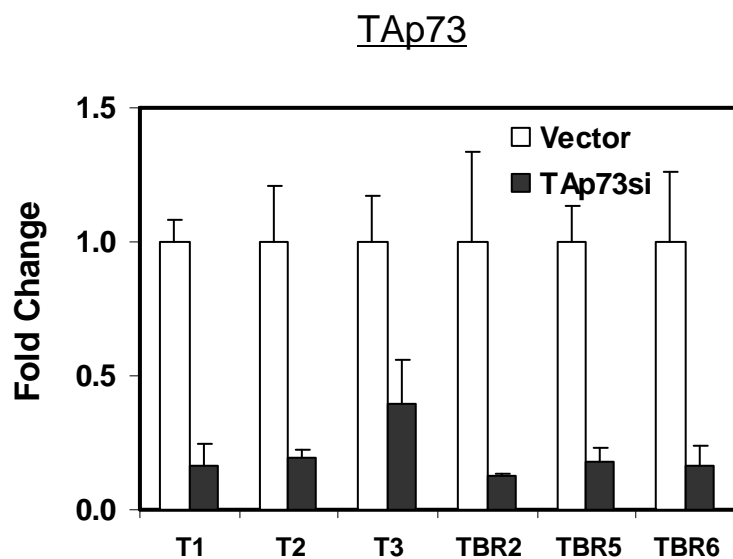

C

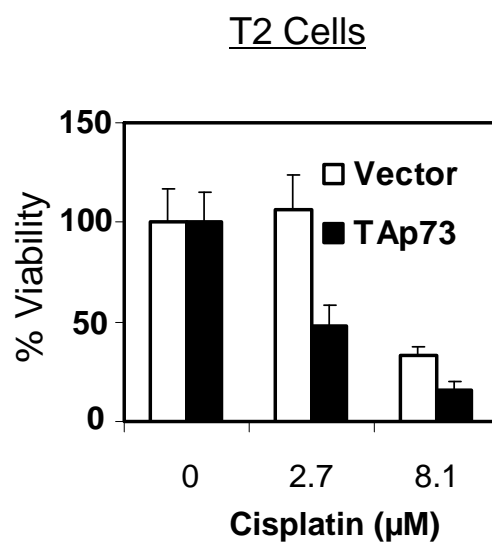

D

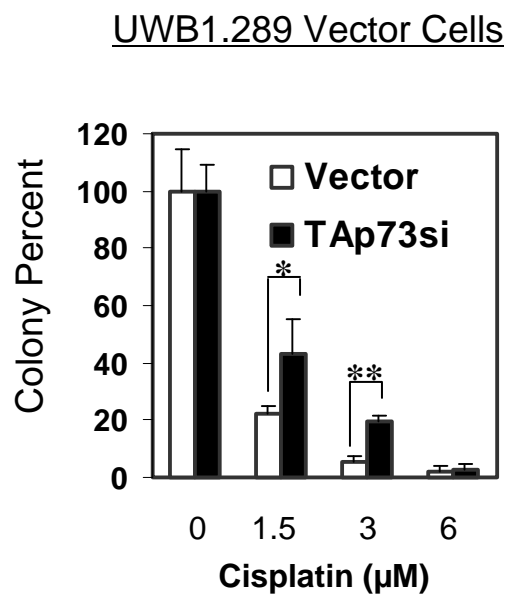

Supplementary Figure 4, Ibrahim et al

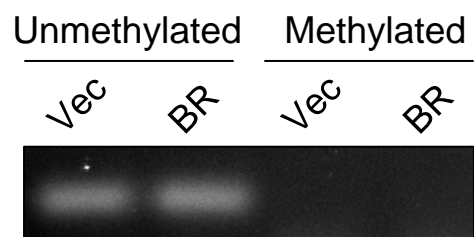

Supplementary Figure 5, Ibrahim et al

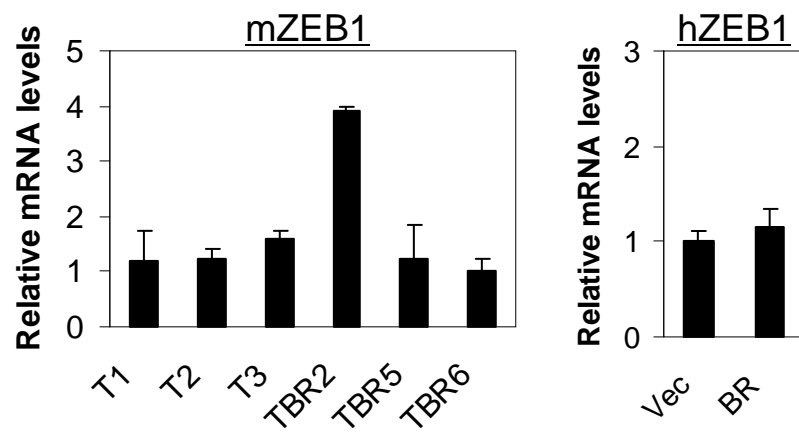

## Supplementary Figure Legends

**Figure S1. Cisplatin sensitivity of BRCA1-deficient cells.** (A) No difference in paclitaxel sensitivity is observed in murine BRCA1 wild-type (T) versus BRCA1-deficient (TBR) lines, assessed by quantitative dose response (MTT) assay at 72 hours. (B) Consistently increased sensitivity to cisplatin, but not paclitaxel, in human and murine BRCA1-deficient ovarian carcinoma cells. UWB1.289 Vector cells are BRCA1-deficient, while the matched UWB1.289 Brca1 cells are reconstituted with BRCA1. IC<sub>50</sub> values were determined by quantitative dose-response curve as in (A). (C) Cisplatin sensitivity of BRCA1-deficient cells is confirmed in a clonogenic assay. Cells were treated with the indicated doses of cisplatin for 1 hour, then plated at clonal density and colonies were counted at 2 weeks. Error bars show SEM for three independent plates. \*\*  $P < .01$

**Figure S2. BRCA1-dependent induction of TAp73 in p53-deficient cells.** (A) Homozygous p53-null MEFs were transduced with a lentivirus expressing a control (Vector) or BRCA1-targeted shRNA (BRCA1si), then selected with puromycin (0.5 µg/ml) for 72 hours prior to (B) treatment with doxorubicin (0.4µg/ml, 16 hours) or control. RNA was analyzed for BRCA1 and TAp73 by QRT-PCR. Error bars show SEM for triplicate plates from a representative experiment.

**Figure S3. TAp73 is a contributor to cisplatin sensitivity.** (A) Ablation of TAp73 induces cisplatin resistance in murine and human BRCA1-deficient, but not BRCA1-expressing, ovarian carcinoma cells. BRCA1 wild-type (T1,2,3; UWB1.289 Brca1) or BRCA1-deficient (TBR2,5,6; UWB1.289 Vector) lines were transduced with lentivirus expressing a control (Vector) or TAp73-directed shRNA (TAp73si), followed by quantitative dose response (MTT) assay at 72 hours. Note that TAp73 knockdown induces resistance comparable to that observed in BRCA1-expressing cells. Note also that independent hairpins were used for TAp73 knockdown in human and murine cells. (B) Knockdown of TAp73 mRNA in murine ovarian carcinoma cells as described in (A). (C) TAp73 overexpression induces cisplatin sensitivity in BRCA1-proficient cells.

Murine T2 ovarian carcinoma cells were transduced with a TAp73 $\beta$ -expressing retrovirus, followed by treatment with cisplatin (48h) at the indicated concentrations and assessment of viability by MTT assay. (D) Cisplatin resistance induced by TAp73 knockdown in BRCA1-deficient cells is confirmed in a clonogenic assay, performed as in Figure S1. Error bars show SEM for three independent plates. \*  $P < .05$ ; \*\*  $P < .01$

**Figure S4. Absence of differential promoter methylation in human UWB1.289 cells.**

Bisulfite modified genomic DNA was subjected to semi-quantitative PCR. No differences were observed in amplification of the methylated or unmethylated product in BRCA1-deficient (Vec) or BRCA1-reconstituted (BR) cells. The primers used are listed in Table S6.

**Figure S5. ZEB1 expression in ovarian tumor lines is independent of BRCA1.**

Levels of ZEB1 were determined by QRT-PCR in murine (left) or human UWB1.289 (right) BRCA1-deficient (TBR2, 5, 6; Vec) and BRCA1-expressing (T1,2,3; BR) ovarian carcinoma cells.

Supplementary Table 1, Ibrahim et al

QRT-PCR primer sequences

| Target       | Forward (5' → 3')        | Reverse (5' → 3')        |
|--------------|--------------------------|--------------------------|
| <b>Human</b> |                          |                          |
| TAp73        | GCACCACGTTTGAGCACCTCT    | GCAGATTGAACTGGGCCATGA    |
| NOXA         | GAGATGCCTGGGAAGAAGG      | ACGTGCACCTCCTGAGAAAA     |
| PUMA         | ACGACCTCAACGCACAGTACGAG  | AGGAGTCCGCATCTCCGTCAGTG  |
| P53AIP1      | AGCTCACTCCGAAAGCCTCTGCTC | GCATCACCGAGAGGTTCTGGTCTC |
| ZEB1         | ACTGCTGGGAGGATGACAGAAA   | AACTGCACAGGGAGCAACTAAA   |
| GAPDH        | CACCCAGAAGACTGTGGATGG    | GTCTACATGGCAACTGTGAGG    |
| <b>Mouse</b> |                          |                          |
| TAp73        | TCGAGCACCTGTGGAGTTCTCT   | CTGGTCCATGGCACTGCTGA     |
| DNp73        | CTCGCCACGGCCAGTTC        | CGGTCACATGCTCTGCCTTC     |
| NOXA         | GGCAGAGCTACCACCTGAG      | CACTCGTCCTTCAAGTCTGCTG   |
| ZEB1         | GGCAAGACAACGTGAAAGACAA   | TCACAATACGGGCAGGTGAG     |
| GAPDH        | GGGAAGCCCATCACCATCTT     | GCCTTCTCCATGGTGGTGAA     |
| BRCA1        | CCCAAAGATGAGCTGGAGAG     | GTCCCACATCACAAGACGTG     |



## Supplementary Table 2, Ibrahim et al

### shRNA targeted sequences

| <b>Target</b>  | <b>Sequence (5' → 3')</b>    |
|----------------|------------------------------|
| Human TAp73    | 5' -GGATTCCAGCATGGACGTCTT-3' |
| Mouse TAp73    | 5' -GCCAGACAGCACCTACTTTGA-3' |
| Human ZEB1si-1 | 5' -CCTCTCTGAAAGAACACATTA-3' |
| Human ZEB1si-2 | 5' -GCTGTTGTTCTGCCAACAGTT-3' |
| Mouse BRCA1    | 5' -CCACAGGTAAATCAGGAATTT-3' |
| Mouse ZEB1si-1 | 5' -CCATAAACATTGCTATTCCTA-3' |
| Mouse ZEB1si-2 | 5' -GCATCATTTGATTGAGCACAT-3' |

## Supplementary Table 3, Ibrahim et al

### Primer sequences for ChIP

| <b>Target</b>       | <b>Forward (5' → 3')</b> | <b>Reverse (5' → 3')</b> |
|---------------------|--------------------------|--------------------------|
| <b><u>Human</u></b> |                          |                          |
| H1 (-1550 to -1137) | ATGCACACCCTCAGCTCCAC     | TGGAACCTGTCGTTTTTGTCC    |
| H2 (-1275 to -839)  | CTGCTTGTCCCAGGCCATC      | CCGCTGGTCTTTGTCTCCAC     |
| H3 (-943 to -519)   | CTGTGCTCTGCCTGGACACT     | GGTTTGGGGTCTCCCTGATG     |
| H4 (-597 to -136)   | TCACACACGCTGTTCCCAAG     | CCTGTGCCCTCTCCACTGTC     |
| H5 (-322 to +88)    | AGGAGCGGGTGTGTGCTGTC     | CAGAGGTGCTCAAACGTGGT     |
| <b><u>Mouse</u></b> |                          |                          |
| M1 (-1550 to -1127) | CCTCTTGGGTCTCAGGGTGT     | GGCCAGTAAAAGGGGACCAG     |
| M2 (-1174 to -729)  | CCCCACCCACTCTCTACCT      | GCCCCAGCTAGTACCCACAAC    |
| M3 (-771 to -287)   | TGAGGAAATCGTGGGAAAG      | GCCAGAAAACGGGTAAAGAAG    |
| M4 (-379 to +69)    | AAAACTGACCCAAGACCACAAA   | CCACAGGTGCTCGAAGGTG      |

## Supplementary Table 4, Ibrahim et al

### Primer sequences for methylation analysis

| Target Region                                                                                 | Forward (5' → 3')              | Reverse (5' → 3')               |
|-----------------------------------------------------------------------------------------------|--------------------------------|---------------------------------|
| <u>P73 promoter: Methylation-specific primer (MSP) and Unmethylated-specific primer (USP)</u> |                                |                                 |
| MSP                                                                                           | GGACGTAGCGAAATCGGGGTTT         | ACCCCGAACATCGACGTCCG            |
| USP                                                                                           | AGGGGATGTAGTGAAATTGGGGTTT      | ATCACAAACCCCAAACATCAACATCCA     |
| <u>P73 intron 1 (numbers relative to exon 2)</u>                                              |                                |                                 |
| MSP (-658 to -551)                                                                            | TGTAGTAGTGGGTATAGTTAGGTTTTAGTC | AAACCTAAAAATAACTCCGATCCCGATCAC  |
| USP (-654 to -548)                                                                            | GTAGTGGGTATAGTTAGGTTTTAGTTGG   | AAACCTAAAAATAACTCCAATCCCAAT     |
| <u>P73 bisulfite sequencing primers (relative to exon 2)</u>                                  |                                |                                 |
| (-754 to -509)                                                                                | TTAACGTTTTAGTTTTGTTAGGTTTTTTTG | ATACAACCAAATTTAAAAATCTCCCTAATAC |
| (-665 to -499)                                                                                | TGTGTTTTGTAGTAGTGGGTATAGTTAGGT | CTAAAAAATACAACCAAATTTAAAAATCTCC |
| (-539 to -246)                                                                                | GTATTAGGGAGATTTTAAATTTGGTTGTAT | TAAAAATACCCTAAACAACAAAAACTTC    |
| (-367 to -85)                                                                                 | GTATTTTAAAGAGTTTGTTTTTTTGAAGG  | AATAAACCTACCTAAAACATCCCTAAAAC   |
| (-154 to +196)                                                                                | ATAGTGAGGGTATAGGGAGGGTAAG      | ATTCCAAAAACTCCAAAAATACTCAAAC    |
| <u>P73 sequencing primers for HpaII/MspI analysis</u>                                         |                                |                                 |
| Human                                                                                         | ATGCACACCCTCAGCTCCA            | GCTCCAGAGGTGCTCAAAC             |
| Mouse                                                                                         | TCCTCTGGGTCTCAGGGTGT           | CTCCACAGGTGCTCGAAGGT            |

Supplementary Table 5, Ibrahim et al

Clinical characteristics of unselected ovarian carcinoma cases

| Cases                         | First Remission<br>(Years) | Grade         | Histology               |
|-------------------------------|----------------------------|---------------|-------------------------|
| <b><u>Responsives</u></b>     |                            |               |                         |
| 115                           | 1.17                       | 3             | Serous                  |
| 126                           | >2.67                      | 3             | Serous and Transitional |
| 134                           | 1.86                       | 3             | Serous                  |
| 141                           | 1.50                       | not specified | Serous                  |
| 147                           | 1.35                       | 3             | Transitional            |
| 148                           | 1.36                       | 3             | Serous                  |
| 153                           | >2.30                      | 3             | Serous                  |
| 163                           | >2.16                      | 3             | Serous and Transitional |
| 182                           | 1.08                       | 2             | Serous                  |
| 216                           | >1.30                      | 3             | Serous                  |
| <b><u>Non-Responsives</u></b> |                            |               |                         |
| 112                           | 0.42                       | 3             | Serous                  |
| 125                           | 0.42                       | 2-3           | Serous                  |
| 132                           | 0.00                       | 2-3           | Serous                  |
| 143                           | 0.33                       | 3             | Serous                  |
| 156                           | 0.31                       | 3             | Serous                  |
| 158                           | 0.12                       | not specified | Poorly differentiated   |
| 167                           | 0.40                       | 3             | Serous                  |
| 204                           | 0.50                       | 3             | Serous                  |

Supplementary Table 6, Ibrahim et al

Clinical characteristics of wild-type (WT) and BRCA1-deficient ovarian carcinoma cases. All tumors were stage III or IV.

| <b>Cases</b>                  | <b>Histology</b> |
|-------------------------------|------------------|
| <b><u>WT</u></b>              |                  |
| 168                           | Serous           |
| 245                           | Serous           |
| 246                           | Serous           |
| 248                           | Clear cell       |
| 257                           | Serous           |
| 261                           | Serous           |
| 298                           | Serous           |
| 313                           | not accessible   |
| <b><u>BRCA1 deficient</u></b> |                  |
| A1                            | Serous           |
| B2                            | Serous           |
| C1                            | Serous           |
| 175                           | not accessible   |
